# Supplementary material for: A nanobody suite for yeast scaffold nucleoporins provides details of the nuclear pore complex structure
Source: PubMed Central journal article supplement (PMC7710722; doi:10.1038/s41467-020-19884-6), 2020-12-02
Supplement: 41467_2020_19884_MOESM1_ESM.pdf [file 41467_2020_19884_MOESM1_ESM.pdf]

## **Supplementary Information for:**

### **A nanobody suite for yeast scaffold nucleoporins provides details of the Nuclear Pore Complex structure**

Sarah A Nordeen<sup>1</sup>, Kasper Andersen<sup>1</sup>, Kevin E Knockenhauer<sup>1</sup>, Jessica R Ingram<sup>2</sup>, Hidde Ploegh<sup>2</sup>, Thomas U Schwartz<sup>1\*</sup>

<sup>1</sup>Department of Biology, Massachusetts Institute of Technology, Cambridge, Massachusetts, United States

<sup>2</sup>Boston Children's Hospital and Harvard Medical School, Boston, Massachusetts, United States

\*corresponding author

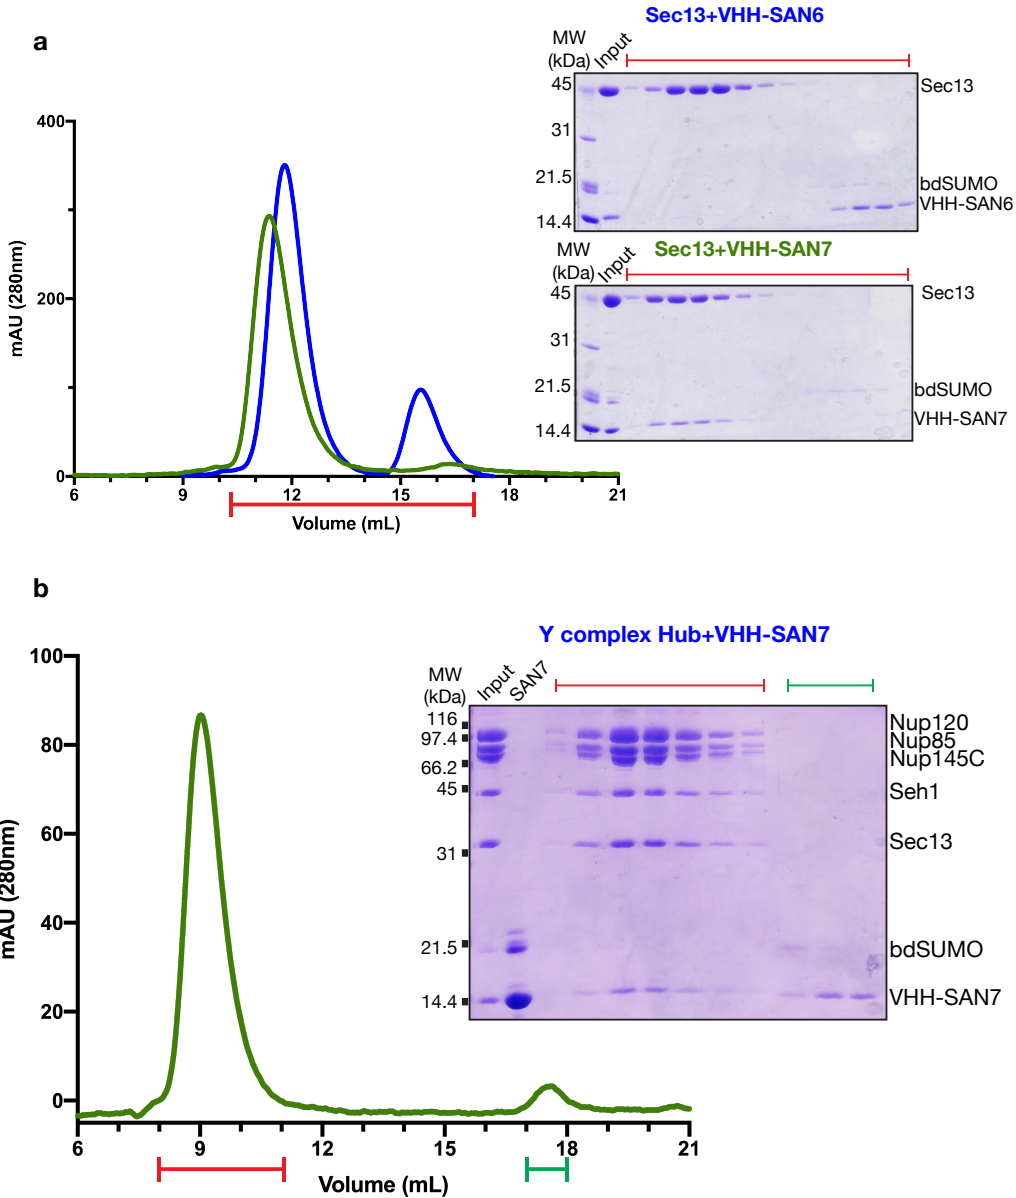

## Supplementary Figure 1.

### VHH-SAN7 binds Sec13 in the Y complex hub

(a) Size exclusion chromatography (SEC) of Sec13-Nup145C<sub>blade</sub> pre-incubated with VHH-SAN6/7 (1:1 molar ratio). SDS-PAGE analysis of SEC experiments for the fractions indicated. Co-migration of Sec13 and VHH-SAN7 indicates complex formation, whereas VHH-SAN6 migrates as a separate peak. (b) SEC with pre-incubated Y complex hub and VHH-SAN7 (1:2 molar ratio). SDS-PAGE analysis of the SEC experiment for the fractions indicated. Co-migration of the hub and VHH-SAN7 shows complex formation. Each panel is a representative experiment from two independent experiments.

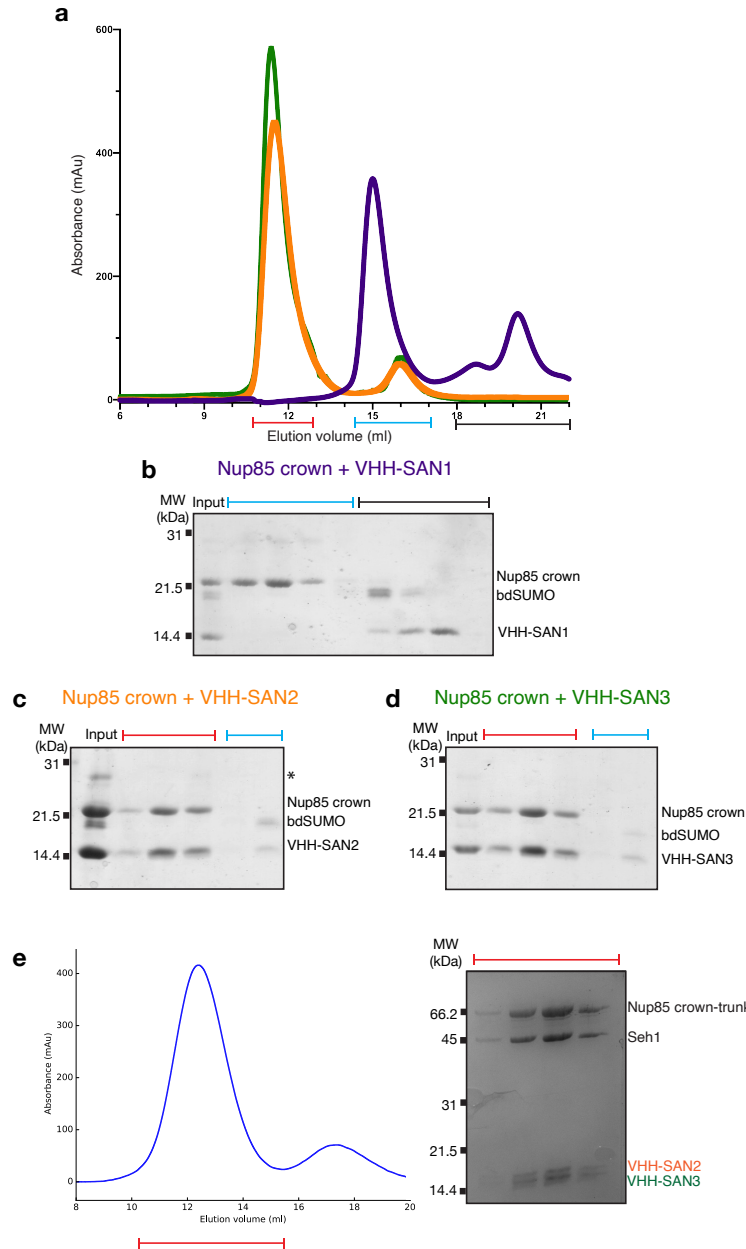

## Supplementary Figure 2.

### VHH-SAN2 and VHH-SAN3 bind the Nup85 crown module

(a) Size exclusion chromatography (SEC) of Nup85<sub>crown</sub> pre-incubated with VHH-SAN1 (purple) VHH-SAN2 (orange) VHH-SAN3 (green) (1:1.5 molar ratio), absorbance at 280 nm. (b, c, d) SDS-PAGE analysis of SEC experiments of the indicated fractions for (b) VHH-SAN1 (c) VHH-SAN2 (c) VHH-SAN3. \* indicates an unknown contaminant. (e) SEC of Nup85<sub>crown-trunk</sub>-Seh1 pre-incubated with VHH-SAN2/3 (1:1.5 molar ratio), absorbance at 280 nm. Left panel shows SDS-PAGE analysis of the indicated fractions. Each panel is a representative experiment from three independent experiments.

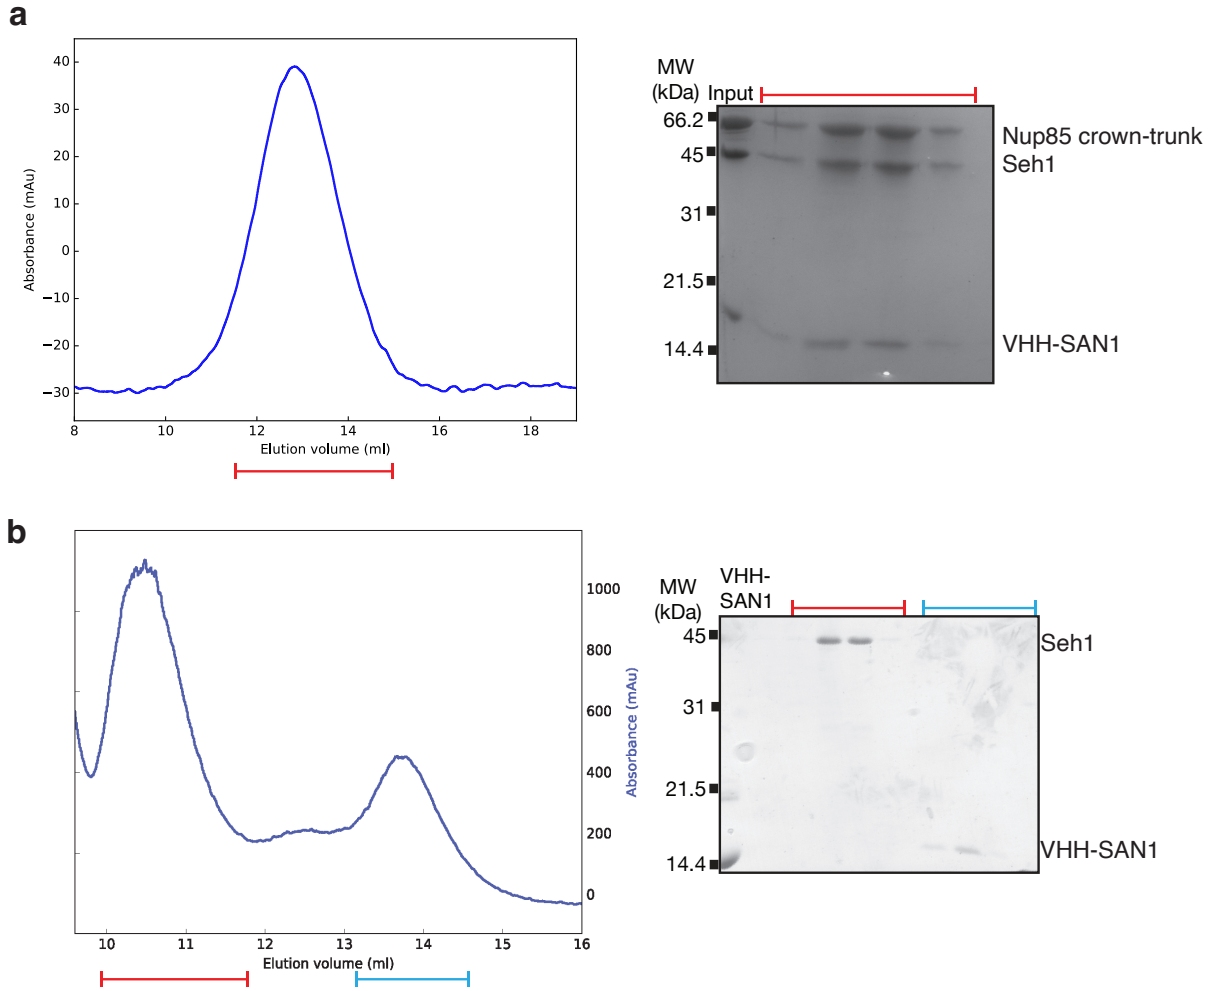

**Supplementary Figure 3.**  
**VHH-SAN1 binds the Nup85 trunk module**

(a) Size exclusion chromatography (SEC) of Nup85<sub>crown-trunk</sub>-Seh1 pre-incubated with VHH-SAN1 (1:1 molar ratio), absorbance at 280 nm. Left panel shows SDS-PAGE analysis of the indicated fractions. (b) SEC of Seh1 pre-incubated with VHH-SAN1 (1:1 molar ratio), absorbance at 220 nm. Left panel shows SDS-PAGE analysis of the indicated fractions.



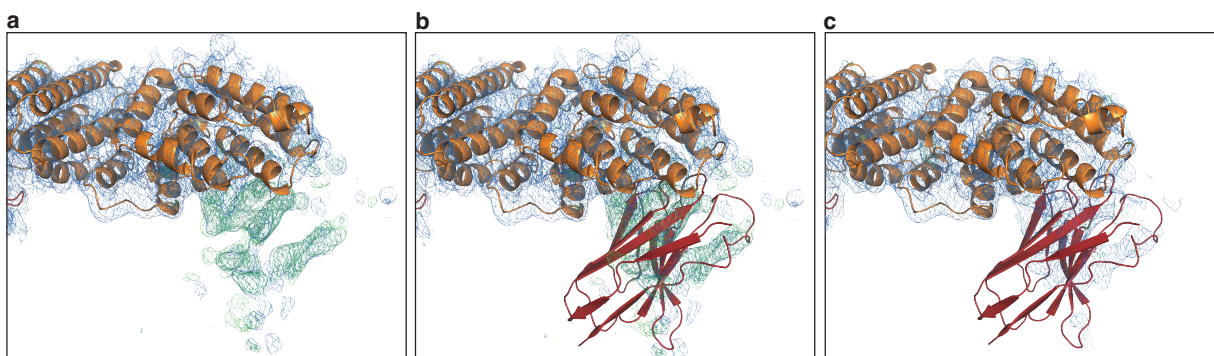

### Supplementary Figure 4.

#### Difference density at the Nup85 crown

Electron density for the Nup85<sub>crow</sub>n and VHH-SAN2.  $2F_o-F_c$  map contoured at  $1\sigma$  is shown in blue, the  $F_o-F_c$  map contoured to  $2.5\sigma$  shown in green. (a) Density after placing only Nup85-Seh1. (b) Rigid body placement of a VHH-SAN2 model. (c) Final density after refinement with VHH-SAN2. Residues outside of the density for VHH-SAN2 have an occupancy set to zero.

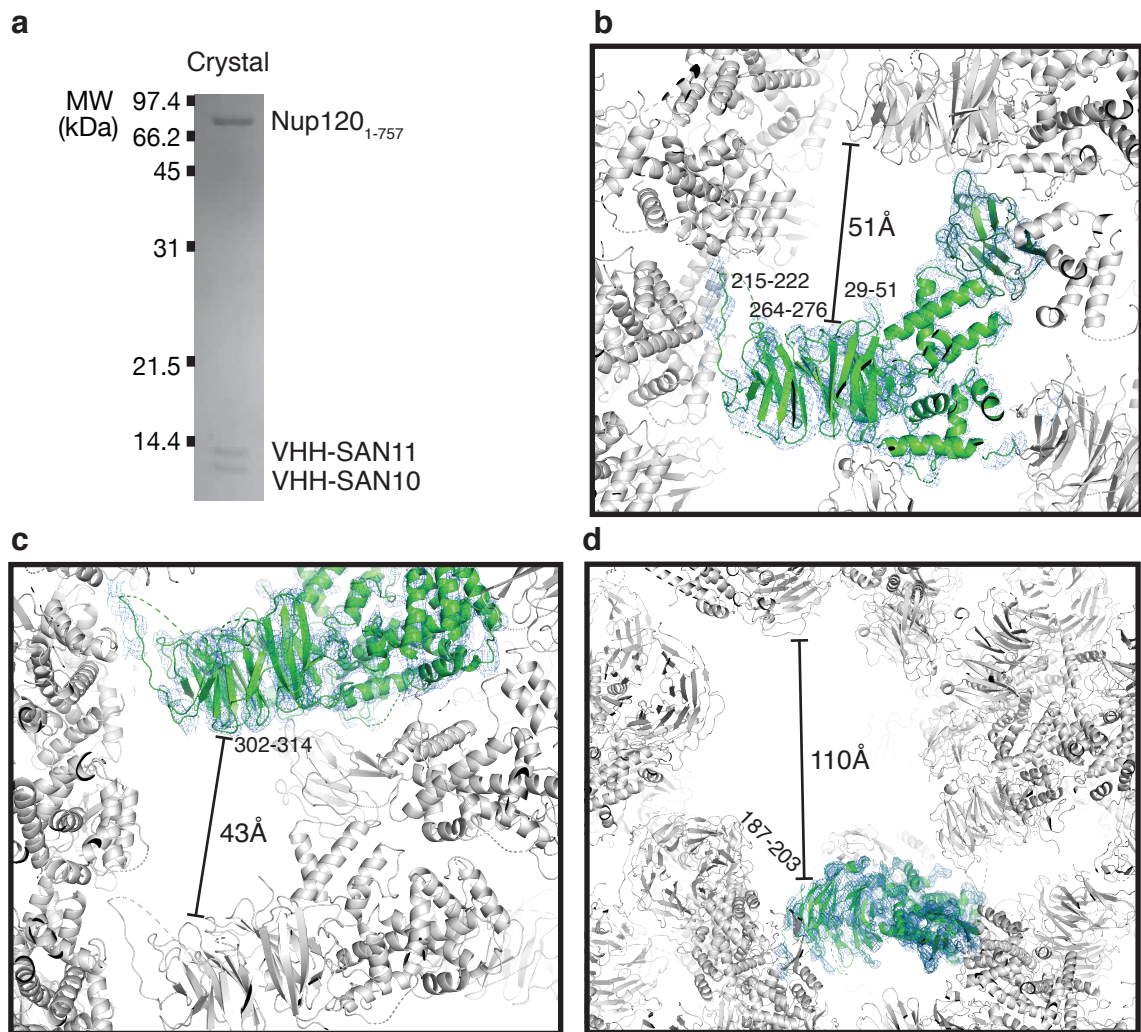

### Supplementary Figure 5.

#### Crystal packing in Nup120-VHH-SAN10/11

(a) SDS-PAGE of Nup120<sub>1-757</sub>-VHH-SAN10/11. Both nanobodies are present in the crystals. Image is representative of two independent experiments. (b, c, d) Views of crystal packing contacts and solvent channels. One copy of Nup120<sub>1-757</sub>-VHH-SAN11 shown in green with 2F<sub>O</sub>-F<sub>C</sub> density contoured to 1σ. Symmetry related molecules are shown in gray. Unbuilt loops lacking electron density are listed and distances between molecules are indicated.

**Supplementary Table 1.**  
**List of Primer Sequences for Cloning**

| Name                                          | Forward primer (5'-3')                                            | Reverse primer (5'-3')                                   | Purpose                                                                                     |
|-----------------------------------------------|-------------------------------------------------------------------|----------------------------------------------------------|---------------------------------------------------------------------------------------------|
| Nup133 FL insert                              | GTGGCTCAAGTGGATC<br>CATGAGTGAATAAAAAA<br>GTACATCTTCG              | CCAGACTCGAGGGTAC<br>CTTAGTATTCTACAGTG<br>TTGGTTTCATAGTTG | Amplify Nup133 for<br>Gibson assembly                                                       |
| pAH<br>His14bdSUMO<br>nup vector open         | CAACTATGAAACCAAC<br>ACTGTAGAATACTAAG<br>GTACCCTCGAGTCTGG          | CGAAGATGTACTTTTTT<br>TTCATCATGGATCCA<br>CTTGAGCCAC       | Amplify pAH<br>His14bdSUMO vector for<br>Gibson assembly                                    |
| Nup133 NTD<br>insert                          | GTTCTGTTCCAGGGGC<br>CCGATTTCGATAATTC<br>CAAGGTTTTACAG             | CCAGACTCGAGGGTAC<br>CTTACTACTCTTTCACA<br>AAAACTGTAGCACC  | Amplify Nup133 NTD for<br>Gibson assembly                                                   |
| pET28 vector<br>open                          | GGTGCTACAGTTTTTT<br>GTGAAAGAGTAGTAAG<br>GTACCCTCGAGTCTGG          | CTGTGAAAACCTTGGGA<br>ATTATCGAATCCGGGC<br>CCCTGGAACAGAAC  | Amplify pET28 6His<br>vector for Gibson<br>assembly                                         |
| Nanobody hit<br>insert                        | GACTGGTGGCTCAAGT<br>GGATCCATGCAGGTGC<br>AGCTCGTG                  | ATGCGGCCGTGTACAT<br>TACTACTATTATGCGG<br>CACGCGGTTCC      | Amplify nanobody hit<br>sequences for Gibson<br>assembly                                    |
| pAH<br>His14bdSUMO<br>nanobody vector<br>open | GGAACCGCGTGCCGC<br>ATAATAGTGATAATGTA<br>CACGGCCGCAT               | GCATGGATCCACTTGA<br>GCCACCAGTC                           | Amplify pAH<br>His14bdSUMO vector for<br>Gibson assembly for<br>nanobody expression         |
| Inverse add nano<br>AviTag                    | CACAGAAAATCGAATG<br>GCATGAATAATAGTGA<br>TAATGTACACGGCCGC<br>AT    | CTTCAAAGATGTCGTT<br>CAGACCCGAGGAGAC<br>GGTGACCTGG        | Add C-terminal AviTag to<br>nanobody expression<br>vector                                   |
| Nup120 mut1                                   | CTAGCGGTGGCTCTGA<br>AGAATATTTGGCTAATT<br>TAGAAACAATATTGAGA<br>GAC | AGCCAGAGCTACCATT<br>TTCATCAATATTTGCT<br>GTGCACG          | Make Nup120 <sub>1-757</sub><br>Δ431-439 (GGGSx2)                                           |
| Nup120 mut2                                   | GCTCAGGTGGTTCTGG<br>CGGAAGTTACTTGAAA<br>AGCCTAACGCG               | CACCGCTGCCACCAGA<br>ACCGCCTAAACCCAAC<br>AAACCGCCATC      | Make Nup120 <sub>1-757</sub><br>Δ187-203 (GGGSx5)                                           |
| pGal, mKate2<br>vector open                   | CCAGGTCACCGTCTCC<br>TCGTCGATATCAAGCT<br>TAATGGTGAGCG              | CACGAGCTGCACCTGC<br>ATTTTTAGCCTGCTTTT<br>TTGTACAAACTTGTG | Amplify Gal promoter<br>yeast expression vector                                             |
| pGal nanobody<br>insert                       | CACAAGTTTGTACAAAA<br>AAGCAGGCTAAAAATG<br>CAGGTGCAGCTCGTG          | CGCTCACCATTAAGCT<br>TGATATCGACGAGGAG<br>ACGGTGACCTGG     | Amplify nanobody for<br>Gibson assembly into<br>yeast expression vector                     |
| Remove mKate2                                 | TAATCGAGTCATGTA<br>ATTAGTTATGTCACGC                               | CGAGGAGACGGTGAC<br>CTG                                   | Remove mKate2 fusion<br>from nanobody yeast<br>expression                                   |
| Nup120 promoter<br>amp                        | GGAACAAAAGCTGGAG<br>CTCTAGTAATGGTACC<br>ACTCCATTTGTTG             | AATAGGTCAGTTGTGT<br>ACGAGTGAAATTGCG                      | Amplify 500bp upstream<br>of Nup120 ORF in yeast                                            |
| Yeast vector<br>open                          | GATGGGCTGCAGGAAT<br>TC                                            | TACTAGAGCTCCAGCT<br>TTTGTTC                              | Amplify yeast expression<br>vector to swap Gal<br>promoter to Nup120<br>promoter            |
| p120 nanobody<br>mKate2 insert                | CACCTCGTACACAACTG<br>ACCTATTATGCAGGTG<br>CAGCTCG                  | GAATTCCTGCAGCCCA<br>TCTTATCTGTGCCCA<br>GTTTGCTAG         | Amplify nanobody for<br>Gibson assembly into<br>Nup120 promoter yeast<br>expression plasmid |

|                           |                                     |                        |                                                                                        |
|---------------------------|-------------------------------------|------------------------|----------------------------------------------------------------------------------------|
| p120 yeast vector<br>open | AATAGGTCAGTTGTGT<br>ACGAGTGAAATTGCG | GATGGGCTGCAGGAAT<br>TC | Amplify Nup120 promoter<br>yeast expression plasmid<br>for nanobody Gibson<br>assembly |
|---------------------------|-------------------------------------|------------------------|----------------------------------------------------------------------------------------|
